# Supplementary material
Source: MDPI journal article supplement (https://www.mdpi.com/2073-4433/15/4/434)
Supplement: s1 [file s1]

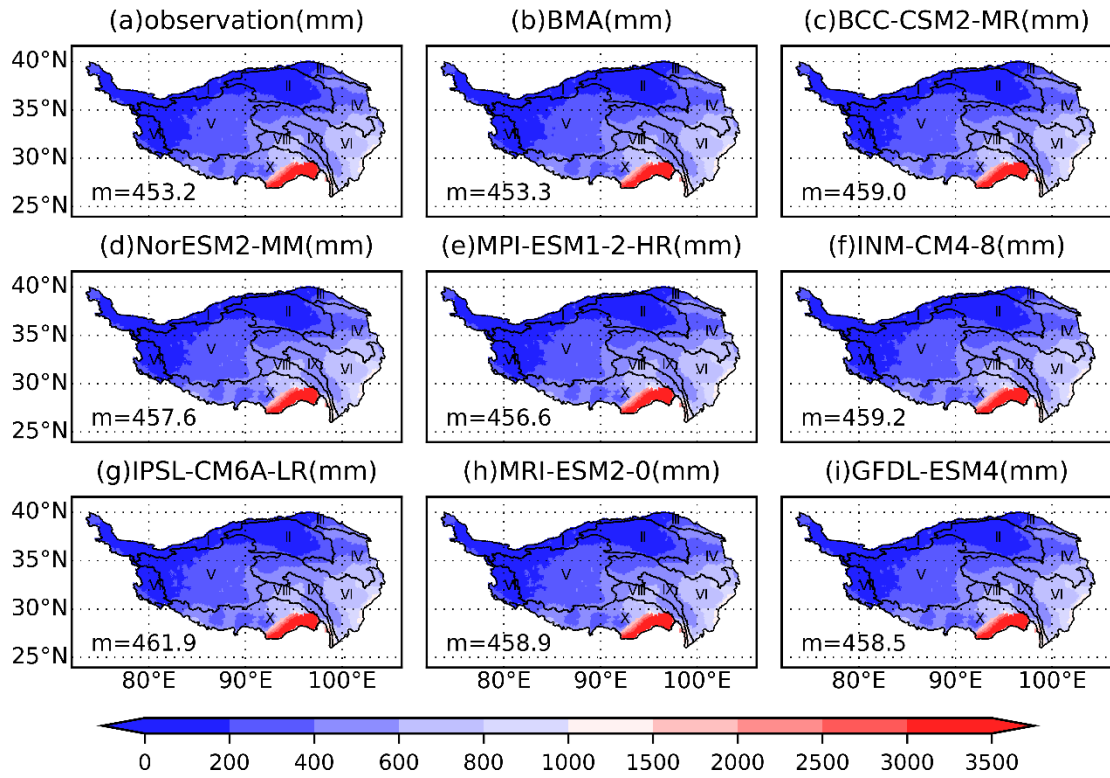

Figure S1. Mean annual precipitation (mm) for (a) observation and corrected data of (b) BMA and (c-i) individual GCMs for the historical period (1979–2013). The mean value of annual precipitation in whole QTP was denoted in each subgraph as m. The numbering (I–X) of each subregion (consistent with Figure 1) is also indicated in each subfigure.

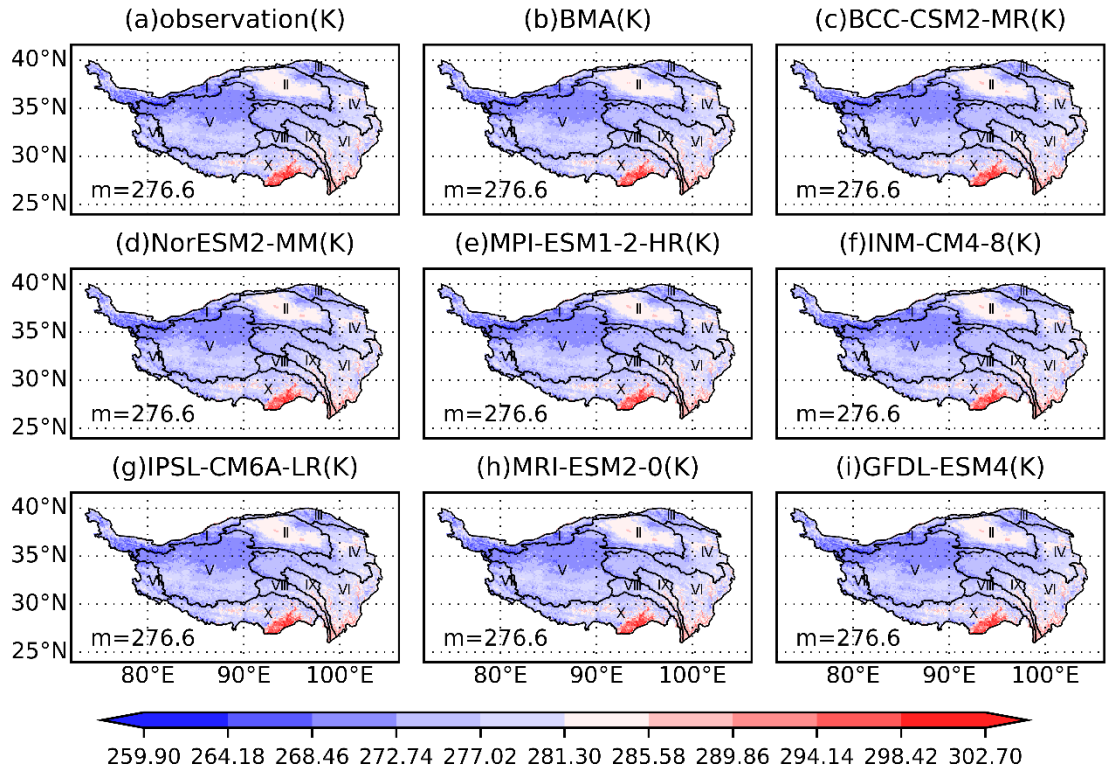

Figure S2. Mean annual value same as Figure S1 but for maximum surface temperature.

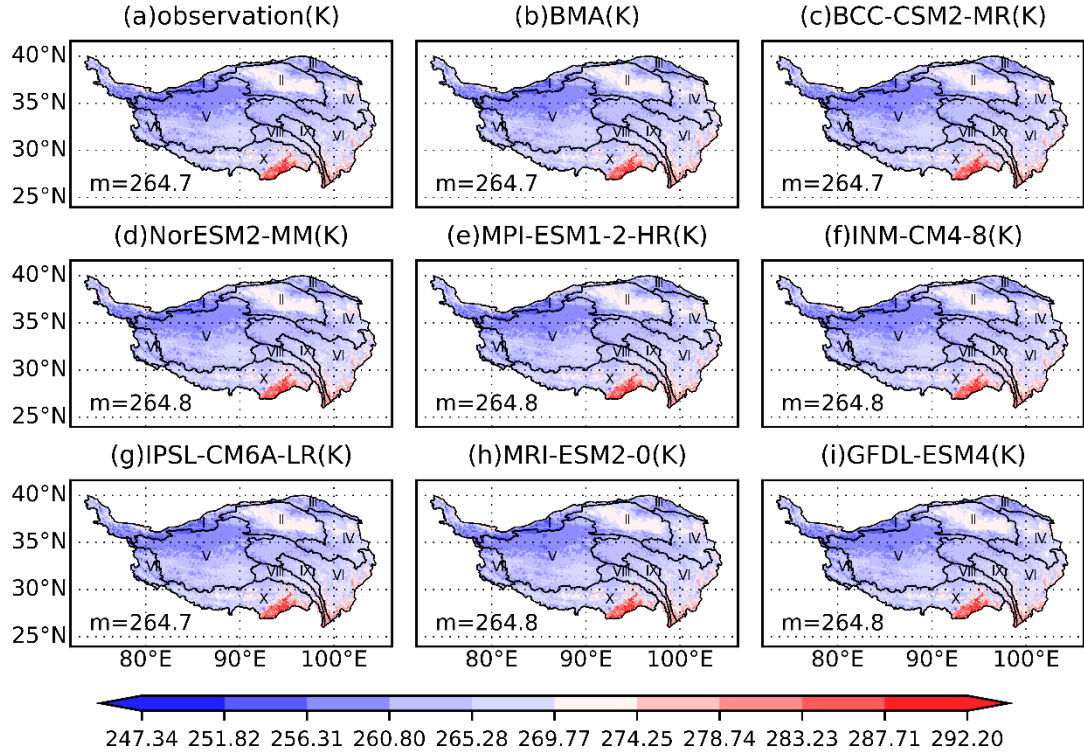

Figure S3. Mean annual value same as Figure S1 but for minimum surface temperature.

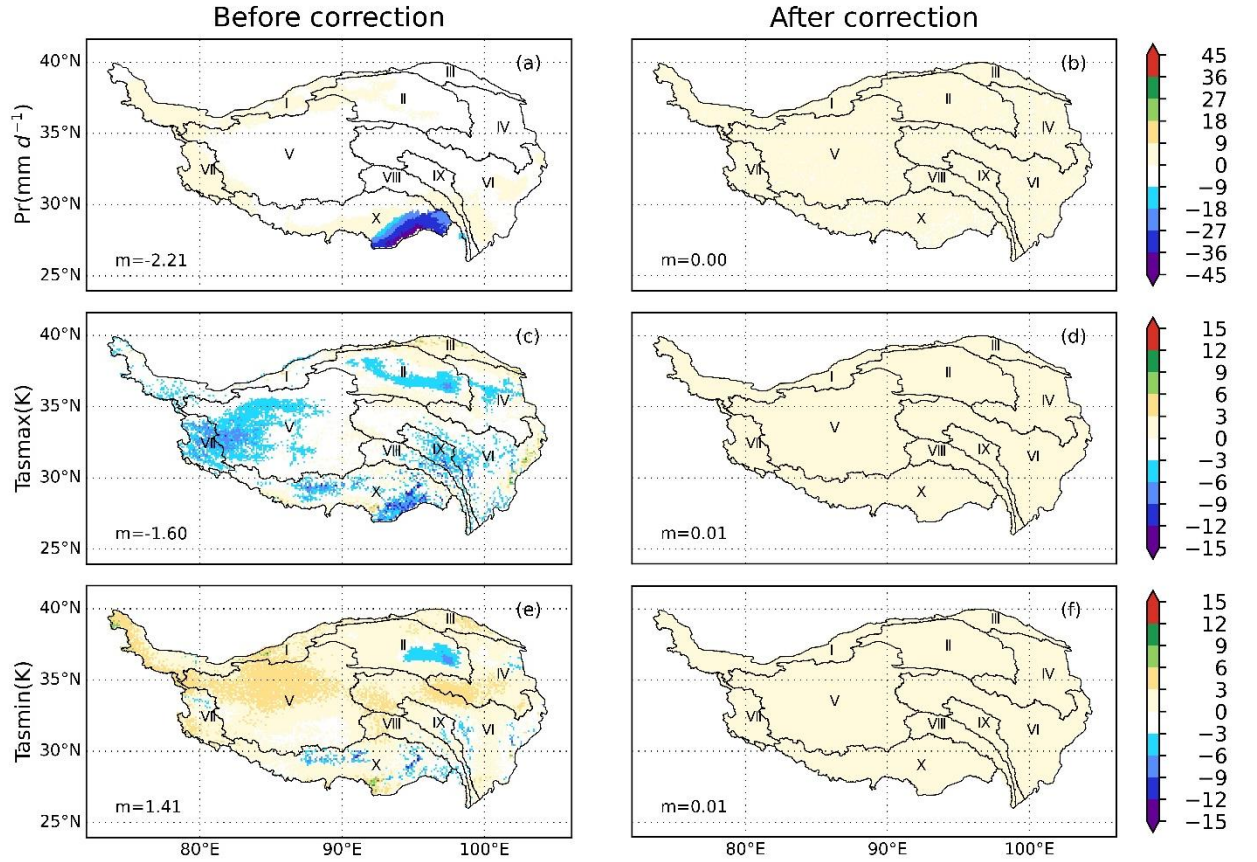

Figure S4. Quantiles Bias (QB) of BMA in the 95th percentile of precipitation, maximum and minimum temperatures for the historical period (1979-2013). (a, c, e) Bias in extreme precipitation (mm), extreme maximum temperature (K),

and extreme minimum temperature(K) before bias-correction, (b, d, f) bias in extreme precipitation (mm), extreme maximum temperature (K), and extreme minimum temperature (K) after bias correction. The 95th percentile of daily precipitation was estimated using rainy days with precipitation more than 0.1 mm. Difference of Figure 4-6. The biases here are not absolute. The mean value of QB in the whole QTP was denoted in each subgraph as m. The numbering (I–X) of each subregion (consistent with Figure 1) is also indicated in each subfigure.

Table S1. Subregions wise BMA projected change in mean annual precipitation (mm), the division of three future is same as Fig. 12 and the historical mean is from 1985 to 2010.

| Basin | Historic mean (mm) | SSP126           |                 |                 | SSP245           |                 |                 | SSP370           |                 |                 | SSP585           |                 |                 |
|-------|--------------------|------------------|-----------------|-----------------|------------------|-----------------|-----------------|------------------|-----------------|-----------------|------------------|-----------------|-----------------|
|       |                    | Near (2025-2049) | Mid (2050-2074) | Far (2075-2100) | Near (2025-2049) | Mid (2050-2074) | Far (2075-2100) | Near (2025-2049) | Mid (2050-2074) | Far (2075-2100) | Near (2025-2049) | Mid (2050-2074) | Far (2075-2100) |
| HXB   | 240.5              | 255.8            | 264.3           | 255.4           | 241              | 254.6           | 277.7           | 247.6            | 257             | 291.1           | 269.1            | 276.3           | 306.5           |
| IDR   | 157.6              | 186.9            | 199.4           | 194             | 172              | 181.6           | 180             | 176              | 188.9           | 199.3           | 193.5            | 207.5           | 233.1           |
| IQTB  | 261.4              | 294.9            | 303.7           | 299.4           | 286.8            | 306.1           | 317.7           | 287.8            | 307.9           | 356.1           | 290.1            | 320.4           | 389.1           |
| MKR   | 602                | 611.1            | 619.5           | 636             | 575.1            | 617.9           | 687.4           | 568.2            | 603.7           | 735.9           | 569.3            | 638.5           | 786.8           |
| QDB   | 167.6              | 188              | 198             | 191             | 172.7            | 190.2           | 207.8           | 180.7            | 191             | 226.3           | 189.3            | 204.3           | 235.9           |
| SWR   | 652.7              | 661              | 662             | 670.5           | 631.4            | 655.5           | 709.7           | 621.4            | 648.7           | 763.3           | 628              | 683.6           | 823.6           |
| TMR   | 144.7              | 160.5            | 168.9           | 160             | 164.5            | 165.1           | 179.5           | 166              | 175.2           | 195.2           | 173.8            | 193.7           | 213.9           |
| YZR   | 598.1              | 609.2            | 624.6           | 647.7           | 579.5            | 615.5           | 670             | 566.6            | 599.7           | 700.4           | 576.2            | 631.9           | 726.1           |
| YLZBR | 1101.2             | 1089.8           | 1088.9          | 1126.7          | 1032.7           | 1085.9          | 1117.7          | 1034.5           | 1062.9          | 1170.5          | 1026.8           | 1116.3          | 1272.9          |
| YR    | 500.1              | 507.5            | 542.6           | 551.3           | 476.1            | 515.4           | 577.8           | 482.3            | 497.4           | 576.2           | 486              | 526.3           | 598.6           |

Table S2. Subregions wise BMA projected change in maximum surface temperature (°C).

| Basin | Historic mean (°C) | ssp126           |                 |                 | ssp245           |                 |                 | ssp370           |                 |                 | ssp585           |                 |                 |
|-------|--------------------|------------------|-----------------|-----------------|------------------|-----------------|-----------------|------------------|-----------------|-----------------|------------------|-----------------|-----------------|
|       |                    | Near (2025-2049) | Mid (2050-2074) | Far (2075-2100) | Near (2025-2049) | Mid (2050-2074) | Far (2075-2100) | Near (2025-2049) | Mid (2050-2074) | Far (2075-2100) | Near (2025-2049) | Mid (2050-2074) | Far (2075-2100) |
| HXB   | 3.7                | 3.0              | 3.4             | 3.2             | 3.0              | 4.0             | 4.6             | 2.9              | 4.3             | 6.0             | 3.2              | 5.0             | 7.1             |
| IDR   | 3.5                | 3.1              | 3.4             | 3.2             | 3.0              | 4.0             | 4.5             | 3.1              | 4.5             | 6.1             | 3.2              | 4.9             | 6.8             |
| IQTB  | 0.6                | 1.5              | 1.9             | 1.8             | 1.5              | 2.5             | 3.1             | 1.4              | 3.0             | 4.6             | 1.5              | 3.4             | 5.5             |
| MKR   | 7.7                | 7.1              | 7.5             | 7.3             | 7.1              | 8.1             | 8.6             | 7.0              | 8.6             | 10.0            | 7.2              | 9.0             | 10.9            |
| QDB   | 5.8                | 6.5              | 6.8             | 6.7             | 6.5              | 7.4             | 8.0             | 6.4              | 7.8             | 9.3             | 6.7              | 8.3             | 10.3            |
| SWR   | 5.8                | 5.4              | 5.9             | 5.7             | 5.5              | 6.4             | 6.9             | 5.4              | 6.9             | 8.4             | 5.5              | 7.3             | 9.3             |
| TMR   | 1.2                | 1.7              | 2.1             | 2.0             | 1.6              | 2.8             | 3.4             | 1.6              | 3.2             | 4.9             | 1.8              | 3.7             | 6.0             |
| YZR   | 5.6                | 6.4              | 6.8             | 6.6             | 6.4              | 7.3             | 7.8             | 6.3              | 7.7             | 9.2             | 6.5              | 8.2             | 10.1            |
| YLZBR | 7.3                | 7.8              | 8.2             | 8.1             | 7.8              | 8.7             | 9.3             | 7.7              | 9.2             | 10.8            | 7.9              | 9.7             | 11.7            |
| YR    | 5.3                | 5.8              | 6.2             | 6.0             | 5.8              | 6.8             | 7.3             | 5.7              | 7.2             | 8.7             | 5.9              | 7.7             | 9.7             |

Table S3. Subregions wise BMA projected change in minimum surface temperature (°C).

| Basin | Historic mean (°C) | ssp126           |                 |                 | ssp245           |                 |                 | ssp370           |                 |                 | ssp585           |                 |                 |
|-------|--------------------|------------------|-----------------|-----------------|------------------|-----------------|-----------------|------------------|-----------------|-----------------|------------------|-----------------|-----------------|
|       |                    | Near (2025-2049) | Mid (2050-2074) | Far (2075-2100) | Near (2025-2049) | Mid (2050-2074) | Far (2075-2100) | Near (2025-2049) | Mid (2050-2074) | Far (2075-2100) | Near (2025-2049) | Mid (2050-2074) | Far (2075-2100) |
| HXB   | -8.3               | -8.8             | -8.4            | -8.7            | -8.8             | -7.7            | -6.9            | -8.9             | -7.3            | -5.3            | -8.6             | -6.6            | -4.1            |
| IDR   | -9.1               | -9.2             | -8.9            | -9.1            | -9.2             | -8.2            | -7.7            | -9.0             | -7.7            | -6.1            | -8.8             | -7.2            | -5.1            |

|       |       |       |      |       |       |      |      |       |      |      |       |      |      |
|-------|-------|-------|------|-------|-------|------|------|-------|------|------|-------|------|------|
| IQTB  | -11.5 | -10.3 | -9.9 | -10.1 | -10.3 | -9.3 | -8.7 | -10.3 | -8.7 | -7.1 | -10.0 | -8.2 | -6.1 |
| MKR   | -4.3  | -4.7  | -4.4 | -4.6  | -4.6  | -3.8 | -3.3 | -4.6  | -3.2 | -1.9 | -4.4  | -2.8 | -1.0 |
| QDB   | -6.4  | -5.4  | -5.1 | -5.3  | -5.4  | -4.4 | -3.8 | -5.5  | -4.0 | -2.3 | -5.2  | -3.4 | -1.3 |
| SWR   | -5.5  | -5.7  | -5.3 | -5.6  | -5.6  | -4.8 | -4.3 | -5.6  | -4.2 | -2.9 | -5.4  | -3.8 | -2.0 |
| TMR   | -10.6 | -9.8  | -9.4 | -9.6  | -9.7  | -8.6 | -7.9 | -9.8  | -8.2 | -6.2 | -9.6  | -7.6 | -5.1 |
| YZR   | -6.3  | -5.4  | -5.0 | -5.2  | -5.3  | -4.4 | -3.9 | -5.3  | -3.9 | -2.5 | -5.1  | -3.4 | -1.6 |
| YLZBR | -3.9  | -3.1  | -2.7 | -2.9  | -3.1  | -2.2 | -1.7 | -3.1  | -1.7 | -0.3 | -2.9  | -1.4 | 0.5  |
| YR    | -6.9  | -6.2  | -5.8 | -6.1  | -6.2  | -5.1 | -4.5 | -6.2  | -4.6 | -2.9 | -6.1  | -4.1 | -1.9 |

Table S4. Subregions wise BMA projected change in the average annual maximum five-day precipitation (mm). Here, the five-day precipitation is calculated by summing the daily precipitation over the basin using a five-day moving window. The annual maximum five-day precipitation represents the maximum value of the five-day precipitation for each year. Finally, the average is taken over all statistical periods to reflect the level of change in future extreme precipitation compared to historical data. The maximum change rates for different scenarios in different future periods are highlighted in bold in the table. The division of three future is same as Table S1 and the historical mean is from 1985 to 2010.

| Basin              |      |                | HXB  | IDR         | IQTB | MKR  | QDB  | SWR  | TMR         | YZR  | YLZBR | YR    |
|--------------------|------|----------------|------|-------------|------|------|------|------|-------------|------|-------|-------|
| Historic mean (mm) |      |                | 19.8 | 17          | 21.3 | 42.1 | 13.5 | 42.9 | 14.7        | 35.6 | 76.7  | 34.3  |
| SSP126             | Near | mean (mm)      | 21.2 | 20.9        | 21.5 | 43.9 | 15.4 | 46.5 | 15.1        | 36.5 | 79.6  | 35.9  |
|                    |      | change rate(%) | 7.1  | <b>22.9</b> | 0.9  | 4.3  | 14.1 | 8.4  | 2.7         | 2.5  | 3.8   | 4.7   |
|                    | Mid  | mean (mm)      | 22.9 | 22.7        | 24.5 | 47.2 | 16.6 | 47.3 | 17.4        | 37.4 | 79.5  | 39.9  |
|                    |      | change rate(%) | 15.7 | <b>33.5</b> | 15   | 12.1 | 23   | 10.3 | 18.4        | 5.1  | 3.7   | 16.3  |
|                    | Far  | mean (mm)      | 21.4 | 22.3        | 24.2 | 46.3 | 15.5 | 46.7 | 15.9        | 37.5 | 74.9  | 38.5  |
|                    |      | change rate(%) | 8.1  | <b>31.2</b> | 13.6 | 10   | 14.8 | 8.9  | 8.2         | 5.3  | -2.3  | 12.2  |
| SSP245             | Near | mean (mm)      | 20.1 | 17.4        | 20.7 | 41.3 | 13.4 | 44.6 | 16.8        | 35.2 | 74.4  | 31.6  |
|                    |      | change rate(%) | 1.5  | 2.4         | -2.8 | -1.9 | -0.7 | 4    | <b>14.3</b> | -1.1 | -3    | -7.9  |
|                    | Mid  | mean (mm)      | 21   | 19.9        | 22.4 | 43.7 | 15.2 | 44.7 | 14.5        | 35.8 | 78.6  | 35.9  |
|                    |      | change rate(%) | 7.1  | <b>22.9</b> | 0.9  | 4.3  | 14.1 | 8.4  | 2.7         | 2.5  | 3.8   | 4.7   |
|                    | Far  | mean (mm)      | 21.9 | 17.7        | 22.8 | 50.5 | 16.2 | 49.9 | 17          | 38.2 | 79.4  | 39    |
|                    |      | change rate(%) | 7.1  | <b>22.9</b> | 0.9  | 4.3  | 14.1 | 8.4  | 2.7         | 2.5  | 3.8   | 4.7   |
| SSP370             | Near | mean (mm)      | 20.3 | 19.2        | 20.6 | 40.8 | 13   | 43.7 | 14.5        | 34.1 | 72.4  | 29.8  |
|                    |      | change rate(%) | 2.5  | <b>12.9</b> | -3.3 | -3.1 | -3.7 | 1.9  | -1.4        | -4.2 | -5.6  | -13.1 |
|                    | Mid  | mean (mm)      | 21   | 20.6        | 21.6 | 44.9 | 14.3 | 49.3 | 16          | 35.7 | 79.4  | 34.1  |
|                    |      | change rate(%) | 6.1  | <b>21.2</b> | 1.4  | 6.7  | 5.9  | 14.9 | 8.8         | 0.3  | 3.5   | -0.6  |
|                    | Far  | mean (mm)      | 23   | 21.2        | 25.5 | 54.5 | 17.5 | 56.2 | 17.8        | 42.8 | 85.6  | 39.8  |
|                    |      | change rate(%) | 16.2 | <b>24.7</b> | 19.7 | 29.5 | 29.6 | 31   | 21.1        | 20.2 | 11.6  | 16    |
| SSP585             | Near | mean (mm)      | 20.1 | 21.1        | 19.9 | 40.3 | 13.4 | 42.8 | 14.8        | 34   | 68.5  | 32.1  |
|                    |      | change rate(%) | 1.5  | <b>24.1</b> | -6.6 | -4.3 | -0.7 | -0.2 | 0.7         | -4.5 | -10.7 | -6.4  |
|                    | Mid  | mean (mm)      | 20.7 | 21.8        | 20.9 | 47   | 13.7 | 47.6 | 17          | 37.9 | 77.7  | 34.2  |
|                    |      | change rate(%) | 4.5  | <b>28.2</b> | -1.9 | 11.6 | 1.5  | 11   | 15.6        | 6.5  | 1.3   | -0.3  |
|                    | Far  | mean (mm)      | 22.6 | 24          | 28.8 | 57.7 | 17.7 | 59.2 | 17.9        | 44.1 | 95.8  | 40.4  |
|                    |      | change rate(%) | 14.1 | <b>41.2</b> | 35.2 | 37.1 | 31.1 | 38   | 21.8        | 23.9 | 24.9  | 17.8  |
